# Supplementary material for: Reliable and practical computational description of molecular crystal polymorphs
Source: PubMed Central journal article supplement — Sci Adv. 2019 Jan 11;5(1):eaau3338. doi: 10.1126/sciadv.aau3338 (PMC6357866; doi:10.1126/sciadv.aau3338), 2019-01-11
Supplement: aau3338_SM.pdf [file aau3338_SM.pdf]

## Supplementary Materials for

### Reliable and practical computational description of molecular crystal polymorphs

Johannes Hoja, Hsin-Yu Ko, Marcus A. Neumann, Roberto Car, Robert A. DiStasio Jr., Alexandre Tkatchenko\*

\*Corresponding author. Email: [alexandre.tkatchenko@uni.lu](mailto:alexandre.tkatchenko@uni.lu)

Published 11 January 2019, *Sci. Adv.* **5**, eaau3338 (2019)

DOI: 10.1126/sciadv.aau3338

#### The PDF file includes:

##### Supplementary Text

Fig. S1. Rank 1 (XXIII-N70) and form A (XXIII-N85) share a sheet structure (red boxes), in which the molecules are arranged according to the same pattern, but the sheets are stacked differently.

Table S1. Relative energies of a benchmark set of structures with small unit cells calculated with different methods.

Table S2. Convergence of relative stabilities with basis set and grid settings.

Table S3. This table shows the MAD and the maximum absolute deviation (MAX) for all possible relative energies (within a system) from table S1 with regard to PBE0 + MBD calculations with tight settings for basis set and grids.

Table S4. Stability ranking for system XXII in kilojoules per mole per molecule.

Table S5. Stability ranking for system XXIII in kilojoules per mole per molecule.

Table S6. Stability ranking for system XXIV in kilojoules per mole per trimer.

Table S7. Stability ranking for system XXV in kilojoules per mole per dimer.

Table S8. Stability ranking for system XXVI in kilojoules per mole per molecule.

Table S9. Errors of PBE + TS-optimized structures with regard to experimental structures.

Table S10. Errors of the thermally expanded structures (corresponding to 300 K within the QHA) with regard to experimental structures.

Legend for data S1

#### Other Supplementary Material for this manuscript includes the following:

(available at [advances.sciencemag.org/cgi/content/full/5/1/eaau3338/DC1](https://advances.sciencemag.org/cgi/content/full/5/1/eaau3338/DC1))

Data S1 (.cif format). All PBE + TS-optimized structures (light settings) and the thermally expanded structures for system XXIII.

## Supplementary Text

### Discussion of Most-Stable Unobserved Structures

In this section, we briefly discuss several structures, which have not been observed in experiment but are very close in terms of stability to experimental structures. Let us first discuss the four systems with only one known experimental structure (XXII, XXIV, XXV, XXVI). We always discuss the relative stabilities in terms of our best ranking which includes PBE+TS vibrational free energies. For system XXII we find one structure (XXII-N3), which is only 0.5 kJ/mol less stable than the experimental structures. However, this structure is very similar to the experimental one. In our similarity search we find that 15 out of 20 molecules match with the experimental structure. For system XXIV the first 3 non-observed polymorphs (XXIV-N3, XXIV-N10, XXIV-N53) are found within 1.3 kJ/mol of the experimental structure. All of them are a partial match w.r.t. the experimental structure, i.e., at least 10 molecules out of 20 match with the experimental structure. In system XXV there are no structures within 3.8 kJ/mol. For system XXVI we find two structures which are within 0.3 kJ/mol of the experimental structure. Also in this case, both of them are very similar to the experimental structure. Structure XXVI-N5 is a partial match (16/20 molecules) and structure XXVI-N4 is in fact a complete match but has a large RMSD of 0.9 Å. Therefore, all structures which are within 1.3 kJ/mol of these experimental structures have several structural features in common with the experimental structure.

Finally, let us discuss the former drug candidate XXIII. For this system we find two structures which are described as more stable than any experimental structure (XXIII-N70 and XXIII-N5). Structure XXIII-N70 is a partial match for form A (13/20 molecules) and will be discussed in more detail below. Structure XXIII-N5 is a disordered structure with two molecules in the asymmetric unit ( $Z' = 2$ ) and is virtually identical with form C. However, given the blind test settings for identical structures, it could not be excluded from the list since only 17 out of 20 molecules are a match. In addition, we find several  $Z' = 1$  and  $Z' = 2$  structures which are structurally sufficiently different and thermodynamically stable enough to potentially crystallize in experiment.

Our most stable structure (XXIII-N70) and form A (XXIII-N85) are structurally very similar, but only form A is observed experimentally despite the fact that structure N70 is predicted to be 4.1 kJ/mol more stable. Even our anharmonic free energy estimate does not significantly change the relative stability. This energy difference is too large to be attributed to a computational error. If form A crystallizes instead of structure N70, form A must be dynamically favored. The vibrational free energy stabilizes structure N70 by 2.8 kJ/mol compared to form A. Without the vibrational free energy calculation, structure N70 is still more stable than form A, but only by 1.3 kJ/mol (PBE0+MBD). The vibrational free energy difference is calculated assuming crystals of infinite size. Free energy may not yet stabilize structure N70 over form A during the nucleation phase, when crystallites are very small. However, since even without the free energy contribution structure N70 is more stable than form A, this observation cannot explain why structure N70 does not crystallize at all. Since the only notable difference between the two structure is the stacking of the sheets (see Figure S1), it may be concluded that under

the explored crystallization conditions crystal growth perpendicular to the sheets is significantly faster for the form A stacking than for the N70 stacking, potentially related to 2D nucleation on the surface. Extremely slow crystal growth may be the key to obtaining structure N70 rather than form A. Since structure N70 and form A share the same molecular conformation, the same hydrogen bonding and much of their surface chemistry, solvents favoring form A over forms B, C, D and E will also favor structure N70 over the other forms. Extremely long slurring or extremely low melting starting from form A may be alternative ways to obtain structure N70. The main challenge will be to avoid conversion to forms B, C, D or E before conversion to structure N70 is achieved.

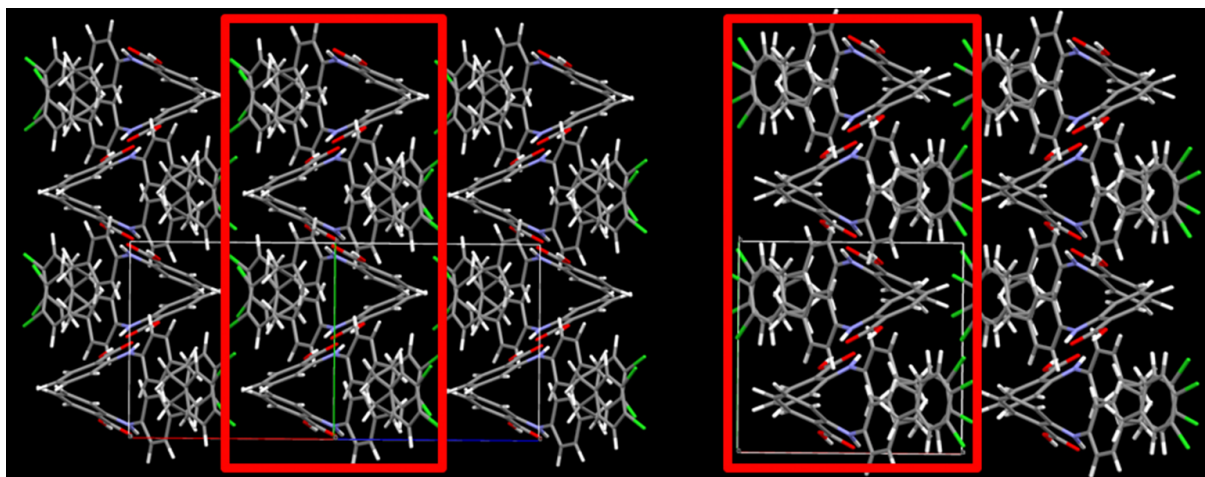

**Fig. S1.** Rank 1 (XXIII-N70) and form A (XXIII-N85) share a sheet structure (red boxes), in which the molecules are arranged according to the same pattern, but the sheets are stacked differently.

**Table S1. Relative energies of a benchmark set of structures with small unit cells calculated with different methods.** The benchmark set consists of the single  $Z = 1$  structure and the top 7  $Z = 2$  structures after the PBE0+MBD ranking for system XXII, and the top 4  $Z = 2$  structures after the PBE0+MBD ranking for system XXIV. The energy of the most stable structure of a system after the PBE0+MBD ranking was set to zero for all methods. The letters after the slash indicate the used basis set and grid settings: *l* corresponds to the *light* species default settings for basis sets and grids in FHI-aims, while *t* refers to the *tight* species default settings. The label *rt* indicates the usage of the *really tight* grid settings together with tier-3 basis functions. All relative energies are in kJ/mol/molecule, or in the case of XXIV in kJ/mol/trimer. The method PBE0+MBD without a label for basis set and grid settings corresponds to the PBE0+MBD estimate used for the stability rankings in the main text and is described in the Methods section of the paper.

| Structure | PBE+MBD/l | PBE+MBD/t | PBE+MBD/rt | PBE0+MBD/l | PBE0+MBD | PBE0+MBD/t |
|-----------|-----------|-----------|------------|------------|----------|------------|
| XXII-N17  | 0.0       | 0.0       | 0.0        | 0.0        | 0.0      | 0.0        |
| XXII-N32  | -0.1      | 0.6       | 0.6        | 0.4        | 1.0      | 0.8        |
| XXII-N36  | 0.6       | 1.3       | 1.3        | 0.9        | 1.6      | 1.6        |
| XXII-N9   | -1.3      | -0.3      | -0.3       | 0.8        | 1.9      | 1.2        |
| XXII-N92  | 1.8       | 1.8       | 1.8        | 2.1        | 2.1      | 2.1        |
| XXII-N24  | -2.4      | 0.6       | 0.8        | -0.3       | 2.7      | 2.3        |
| XXII-N39  | 0.5       | 1.1       | 1.0        | 2.3        | 2.9      | 2.4        |
| XXII-N44  | 0.9       | 1.5       | 1.5        | 2.5        | 3.1      | 2.5        |
| XXIV-N53  | 0.0       | 0.0       | 0.0        | 0.0        | 0.0      | 0.0        |
| XXIV-N6   | 0.2       | 0.9       | 0.8        | 1.1        | 1.7      | 2.0        |
| XXIV-N19  | 3.1       | 3.4       | 3.4        | 2.5        | 2.8      | 3.5        |
| XXIV-N12  | 2.0       | 2.2       | 2.2        | 3.2        | 3.4      | 3.4        |

**Table S2. Convergence of relative stabilities with basis set and grid settings.** This table shows the mean absolute deviation (MAD) and the maximum absolute deviation (MAX) for all possible relative energies (within a system) from table S1 w.r.t. PBE+MBD calculations with *really tight* settings for basis set and grids.

| Method        | MAD [kJ/mol] | MAX [kJ/mol] |
|---------------|--------------|--------------|
| PBE+MBD/light | 0.9          | 3.2          |
| PBE+MBD/tight | 0.1          | 0.3          |

**Table S3. This table shows the MAD and the maximum absolute deviation (MAX) for all possible relative energies (within a system) from table S1 with regard to PBE0 + MBD calculations with tight settings for basis set and grids.** The method PBE0+MBD without a label for basis set and grid settings corresponds to the PBE0+MBD estimate used for the stability rankings in the main text and is described in the Methods section of the paper.

| Method         | MAD [kJ/mol] | MAX [kJ/mol] |
|----------------|--------------|--------------|
| PBE+MBD/light  | 1.6          | 4.8          |
| PBE+MBD/tight  | 0.8          | 1.8          |
| PBE0+MBD/light | 0.8          | 2.6          |
| PBE0+MBD       | 0.4          | 0.8          |

**Table S4. Stability ranking for system XXII in kilojoules per mole per molecule.** The energy of the most stable structure in each ranking was set to zero and the structures are always ordered according to the highest available ranking level. The final ranking includes vibrational free energies calculated at 150 K. In addition, this table contains the number of molecules in the unit cell ( $Z$ ), the space group (Symm.), and the density in  $\text{g/cm}^3$ .

| Name           | $Z$ Symm.    | Density | PBE+TS | PBE+MBD | PBE0+MBD | PBE0+MBD+ $F_{\text{vib}}$ |
|----------------|--------------|---------|--------|---------|----------|----------------------------|
| XXII-N2 (Exp.) | 4 P 21/n     | 1.677   | 1.7    | 0.7     | 0.0      | 0.0                        |
| XXII-N3        | 4 P 21/c     | 1.672   | 1.7    | 0.6     | 0.6      | 0.5                        |
| XXII-N4        | 4 P 21/c     | 1.688   | 2.5    | 1.2     | 1.0      | 1.9                        |
| XXII-N1        | 4 P n a 21   | 1.715   | 0.0    | 0.0     | 1.8      | 2.5                        |
| XXII-N19       | 4 P 21/n     | 1.669   | 5.2    | 4.1     | 3.9      | 4.1                        |
| XXII-N6        | 4 P 21/n     | 1.701   | 3.7    | 2.4     | 3.7      | 4.4                        |
| XXII-N7        | 4 P 21 21 21 | 1.703   | 2.8    | 1.9     | 4.3      | 4.8                        |
| XXII-N17       | 2 P 21       | 1.639   | 7.3    | 4.4     | 4.4      | n/d                        |
| XXII-N27       | 4 P 21 21 21 | 1.668   | 6.1    | 5.1     | 4.5      | n/d                        |
| XXII-N20       | 4 P n a 21   | 1.634   | 7.6    | 4.1     | 4.5      | n/d                        |
| XXII-N35       | 4 P 21/n     | 1.673   | 6.3    | 4.6     | 4.8      | n/d                        |
| XXII-N5        | 8 I 2/c      | 1.728   | 2.8    | 3.2     | 5.1      | n/d                        |
| XXII-N8        | 4 P 21/c     | 1.709   | 4.0    | 3.8     | 5.2      | n/d                        |
| XXII-N37       | 4 P 21/c     | 1.659   | 6.9    | 5.3     | 5.3      | n/d                        |
| XXII-N32       | 2 P -1       | 1.659   | 7.2    | 4.9     | 5.4      | n/d                        |
| XXII-N46       | 4 P 21/c     | 1.657   | 7.4    | 5.3     | 5.4      | n/d                        |
| XXII-N13       | 4 P n m a    | 1.712   | 4.2    | 4.0     | 5.5      | n/d                        |
| XXII-N22       | 4 P 21/c     | 1.609   | 7.8    | 3.9     | 5.6      | n/d                        |
| XXII-N67       | 4 P 21/n     | 1.626   | 8.8    | 5.2     | 5.7      | n/d                        |
| XXII-N52       | 4 P 21/c     | 1.663   | 6.8    | 5.5     | 5.9      | n/d                        |
| XXII-N36       | 2 P -1       | 1.669   | 6.7    | 5.7     | 6.0      | n/d                        |
| XXII-N42       | 4 P 21/n     | 1.659   | 6.9    | 5.3     | 6.0      | n/d                        |
| XXII-N11       | 4 P n m a    | 1.712   | 4.0    | 3.8     | 6.1      | n/d                        |
| XXII-N70       | 8 P b c a    | 1.607   | 8.0    | 6.0     | 6.2      | n/d                        |
| XXII-N9        | 2 P -1       | 1.705   | 5.0    | 4.1     | 6.3      | n/d                        |
| XXII-N34       | 4 P 21 21 21 | 1.660   | 7.6    | 5.3     | 6.3      | n/d                        |
| XXII-N21       | 4 P 21/n     | 1.721   | 4.3    | 5.0     | 6.4      | n/d                        |
| XXII-N18       | 4 P 21 21 21 | 1.664   | 7.4    | 4.4     | 6.4      | n/d                        |
| XXII-N41       | 8 P b c a    | 1.684   | 6.4    | 5.6     | 6.5      | n/d                        |
| XXII-N92       | 2 P 21       | 1.666   | 7.8    | 6.2     | 6.5      | n/d                        |
| XXII-N53       | 4 P 21/c     | 1.661   | 8.0    | 5.9     | 6.6      | n/d                        |
| XXII-N76       | 4 P -1       | 1.730   | 4.5    | 5.1     | 6.7      | n/d                        |
| XXII-N16       | 4 P 21/n     | 1.708   | 4.6    | 4.6     | 6.7      | n/d                        |
| XXII-N30       | 8 P 21/n     | 1.729   | 2.9    | 4.6     | 6.9      | n/d                        |
| XXII-N10       | 4 P 21/n     | 1.727   | 3.1    | 3.7     | 6.9      | n/d                        |
| XXII-N85       | 4 P 21/c     | 1.649   | 7.7    | 6.7     | 6.9      | n/d                        |
| XXII-N26       | 4 P 21/n     | 1.657   | 7.2    | 5.0     | 7.0      | n/d                        |

**Table S4.** (continued) Stability ranking for system XXII.

| Name      | Z | Symm.      | Density | PBE+TS | PBE+MBD | PBE0+MBD | PBE0+MBD+ $F_{\text{vib}}$ |
|-----------|---|------------|---------|--------|---------|----------|----------------------------|
| XXII-N29  | 4 | P 21/c     | 1.684   | 6.1    | 5.4     | 7.0      | n/d                        |
| XXII-N47  | 4 | P 21/c     | 1.664   | 7.3    | 6.3     | 7.0      | n/d                        |
| XXII-N88  | 4 | P c a 21   | 1.729   | 3.9    | 5.1     | 7.1      | n/d                        |
| XXII-N24  | 2 | P c        | 1.746   | 2.6    | 4.9     | 7.1      | n/d                        |
| XXII-N25  | 4 | P 21/c     | 1.724   | 3.2    | 5.7     | 7.2      | n/d                        |
| XXII-N43  | 4 | P 21/c     | 1.670   | 6.4    | 5.5     | 7.2      | n/d                        |
| XXII-N58  | 4 | P 21 21 21 | 1.696   | 5.8    | 6.0     | 7.3      | n/d                        |
| XXII-N39  | 2 | P 21/m     | 1.718   | 5.2    | 5.5     | 7.3      | n/d                        |
| XXII-N83  | 2 | P -1       | 1.614   | 8.6    | 6.5     | 7.3      | n/d                        |
| XXII-N73  | 4 | P 21/c     | 1.670   | 8.0    | 6.5     | 7.3      | n/d                        |
| XXII-N12  | 4 | P 21/c     | 1.706   | 4.8    | 4.9     | 7.4      | n/d                        |
| XXII-N62  | 4 | P 21/c     | 1.635   | 8.4    | 5.8     | 7.4      | n/d                        |
| XXII-N44  | 1 | P 1        | 1.730   | 5.8    | 5.8     | 7.5      | n/d                        |
| XXII-N15  | 4 | P 21/n     | 1.654   | 6.9    | 4.7     | 7.5      | n/d                        |
| XXII-N40  | 4 | P c a 21   | 1.744   | 4.0    | 5.7     | 7.6      | n/d                        |
| XXII-N23  | 2 | P m n 21   | 1.689   | 5.6    | 4.7     | 7.6      | n/d                        |
| XXII-N33  | 4 | P 21/n     | 1.698   | 5.5    | 6.0     | 7.7      | n/d                        |
| XXII-N64  | 2 | P 21       | 1.685   | 7.5    | 6.4     | 7.7      | n/d                        |
| XXII-N31  | 8 | P b c a    | 1.701   | 6.1    | 5.4     | 7.9      | n/d                        |
| XXII-N86  | 4 | P 21/n     | 1.698   | 6.2    | 6.7     | 8.1      | n/d                        |
| XXII-N93  | 4 | P c a 21   | 1.607   | 10.8   | 6.7     | 8.2      | n/d                        |
| XXII-N48  | 4 | P 21/c     | 1.701   | 6.2    | 5.5     | 8.2      | n/d                        |
| XXII-N77  | 4 | P 21/c     | 1.715   | 5.6    | 6.1     | 8.2      | n/d                        |
| XXII-N28  | 4 | P 21/n     | 1.689   | 6.3    | 5.1     | 8.2      | n/d                        |
| XXII-N65  | 4 | P 21/c     | 1.693   | 5.8    | 5.6     | 8.3      | n/d                        |
| XXII-N84  | 8 | C 2/c      | 1.668   | 8.4    | 7.1     | 8.3      | n/d                        |
| XXII-N97  | 2 | P -1       | 1.702   | 6.2    | 5.8     | 8.3      | n/d                        |
| XXII-N66  | 4 | P n a 21   | 1.620   | 10.6   | 5.7     | 8.3      | n/d                        |
| XXII-N63  | 4 | P 21 21 21 | 1.717   | 4.3    | 6.8     | 8.3      | n/d                        |
| XXII-N45  | 8 | P b c a    | 1.719   | 5.2    | 6.4     | 8.4      | n/d                        |
| XXII-N55  | 4 | P 21/c     | 1.664   | 7.6    | 6.8     | 8.4      | n/d                        |
| XXII-N82  | 4 | P 21/n     | 1.626   | 10.0   | 6.3     | 8.5      | n/d                        |
| XXII-N71  | 4 | P 21/n     | 1.708   | 5.4    | 6.5     | 8.6      | n/d                        |
| XXII-N74  | 4 | P 21/n     | 1.725   | 4.6    | 6.3     | 8.6      | n/d                        |
| XXII-N57  | 4 | P n m a    | 1.696   | 6.3    | 5.8     | 8.7      | n/d                        |
| XXII-N61  | 4 | P 21/c     | 1.717   | 6.8    | 6.3     | 8.7      | n/d                        |
| XXII-N59  | 4 | P 21/n     | 1.695   | 7.2    | 7.2     | 8.9      | n/d                        |
| XXII-N69  | 2 | P -1       | 1.752   | 4.9    | 7.7     | 9.0      | n/d                        |
| XXII-N78  | 2 | P 21       | 1.716   | 4.8    | 7.3     | 9.1      | n/d                        |
| XXII-N72  | 4 | P 21/c     | 1.723   | 5.0    | 7.5     | 9.2      | n/d                        |
| XXII-N100 | 8 | I 2/c      | 1.711   | 5.9    | 7.0     | 9.2      | n/d                        |
| XXII-N51  | 4 | P 21/c     | 1.689   | 7.6    | 6.6     | 9.4      | n/d                        |

**Table S4.** (continued) Stability ranking for system XXII.

| Name     | Z | Symm.      | Density | PBE+TS | PBE+MBD | PBE0+MBD | PBE0+MBD+ $F_{\text{vib}}$ |
|----------|---|------------|---------|--------|---------|----------|----------------------------|
| XXII-N79 | 4 | P 21/c     | 1.710   | 6.4    | 8.1     | 9.5      | n/d                        |
| XXII-N87 | 4 | P n a 21   | 1.718   | 6.1    | 7.9     | 9.6      | n/d                        |
| XXII-N54 | 4 | P 21/c     | 1.702   | 6.2    | 6.7     | 9.7      | n/d                        |
| XXII-N89 | 2 | P -1       | 1.662   | 7.3    | 6.7     | 9.7      | n/d                        |
| XXII-N90 | 4 | P 21/c     | 1.671   | 8.1    | 6.9     | 9.7      | n/d                        |
| XXII-N81 | 4 | P 21/c     | 1.691   | 7.7    | 7.5     | 10.0     | n/d                        |
| XXII-N99 | 4 | P -1       | 1.691   | 7.4    | 7.4     | 10.0     | n/d                        |
| XXII-N75 | 8 | P b c a    | 1.703   | 6.6    | 7.3     | 10.1     | n/d                        |
| XXII-N80 | 4 | P 21/c     | 1.705   | 6.9    | 7.3     | 10.1     | n/d                        |
| XXII-N91 | 2 | P -1       | 1.710   | 7.6    | 7.5     | 10.2     | n/d                        |
| XXII-N95 | 4 | P 21/c     | 1.687   | 7.4    | 7.4     | 10.2     | n/d                        |
| XXII-N68 | 4 | P 21/n     | 1.719   | 5.8    | 7.6     | 10.3     | n/d                        |
| XXII-N96 | 4 | P 21 21 21 | 1.639   | 9.0    | 6.7     | 10.6     | n/d                        |
| XXII-N94 | 4 | P 21/c     | 1.671   | 8.9    | 7.5     | 10.7     | n/d                        |
| XXII-N98 | 4 | P 21/c     | 1.665   | 8.6    | 7.2     | 10.7     | n/d                        |



**Table S5. Stability ranking for system XXIII in kilojoules per mole per molecule.** The energy of the most stable structure in each ranking was set to zero and the structures are always ordered according to the highest available ranking level. The final ranking includes vibrational free energies calculated at 300 K. In addition, this table contains the number of molecules in the asymmetric unit ( $Z'$ ), the number of molecules in the unit cell ( $Z$ ), the space group (Symm.), and the density in  $\text{g/cm}^3$ .

| Name               | $Z'$ | $Z$ | Symm.    | Density | PBE+TS | PBE+MBD | PBE0+MBD | PBE0+MBD+ $F_{\text{vib}}$ |
|--------------------|------|-----|----------|---------|--------|---------|----------|----------------------------|
| XXIII-N70          | 1    | 4   | P 21/n   | 1.388   | 11.1   | 3.4     | 4.0      | 0.0                        |
| XXIII-N5           | 2    | 4   | P -1     | 1.440   | 6.9    | 0.7     | 0.1      | 1.4                        |
| XXIII-E (Form E)   | 2    | 4   | P -1     | 1.418   | 9.4    | 2.7     | 3.2      | 1.4                        |
| XXIII-N6 (Form C)  | 2    | 4   | P -1     | 1.440   | 6.9    | 0.7     | 0.1      | 1.5                        |
| XXIII-N31          | 1    | 2   | P -1     | 1.424   | 6.4    | 2.7     | 3.9      | 2.1                        |
| XXIII-N18          | 1    | 2   | P -1     | 1.454   | 6.7    | 0.5     | 0.0      | 2.2                        |
| XXIII-N2           | 2    | 4   | P -1     | 1.434   | 4.4    | 0.0     | 2.1      | 2.2                        |
| XXIII-N4 (Form B)  | 1    | 2   | P -1     | 1.445   | 4.6    | 2.0     | 1.5      | 2.5                        |
| XXIII-N42          | 1    | 2   | P -1     | 1.433   | 6.0    | 1.3     | 1.8      | 3.0                        |
| XXIII-N22          | 2    | 4   | P -1     | 1.454   | 4.6    | 2.9     | 3.1      | 3.5                        |
| XXIII-N1           | 2    | 8   | P 21/n   | 1.425   | 11.3   | 2.6     | 4.4      | 3.5                        |
| XXIII-N13          | 2    | 8   | P 21/n   | 1.415   | 12.8   | 3.2     | 4.7      | 3.6                        |
| XXIII-N100         | 1    | 4   | P 21/n   | 1.449   | 10.5   | 4.0     | 3.9      | 3.7                        |
| XXIII-N7           | 2    | 4   | P -1     | 1.436   | 6.4    | 1.9     | 2.5      | 3.8                        |
| XXIII-N68          | 1    | 4   | P 21/n   | 1.423   | 7.2    | 2.0     | 2.6      | 3.9                        |
| XXIII-N85 (Form A) | 1    | 4   | P 21/c   | 1.394   | 9.0    | 4.6     | 5.3      | 4.1                        |
| XXIII-N3           | 1    | 8   | I 2/a    | 1.440   | 1.3    | 1.5     | 2.7      | 4.1                        |
| XXIII-N39 (Form D) | 1    | 4   | P 21/n   | 1.384   | 11.1   | 4.9     | 6.7      | 4.3                        |
| XXIII-N53          | 1    | 2   | P -1     | 1.415   | 7.5    | 4.5     | 5.1      | 4.4                        |
| XXIII-N28          | 1    | 2   | P -1     | 1.430   | 1.8    | 2.5     | 3.5      | 4.4                        |
| XXIII-N33          | 2    | 4   | P -1     | 1.433   | 7.8    | 4.7     | 4.5      | 4.5                        |
| XXIII-N10          | 2    | 8   | P 21/n   | 1.431   | 9.6    | 2.3     | 3.8      | 4.6                        |
| XXIII-N26          | 2    | 8   | P 21/c   | 1.427   | 8.0    | 3.7     | 4.0      | 4.8                        |
| XXIII-N8           | 2    | 8   | P 21/n   | 1.425   | 10.2   | 2.4     | 4.2      | 5.0                        |
| XXIII-N46          | 2    | 4   | P -1     | 1.440   | 6.6    | 3.9     | 4.7      | 5.0                        |
| XXIII-N38          | 1    | 4   | P 21/c   | 1.390   | 11.6   | 2.0     | 4.7      | 5.1                        |
| XXIII-N30          | 2    | 4   | P -1     | 1.442   | 9.2    | 3.3     | 3.7      | 5.2                        |
| XXIII-N25          | 2    | 4   | P -1     | 1.442   | 8.9    | 3.2     | 3.6      | 5.3                        |
| XXIII-N20          | 2    | 8   | P 21/c   | 1.437   | 1.7    | 2.8     | 4.3      | 5.5                        |
| XXIII-N52          | 2    | 4   | P -1     | 1.449   | 7.8    | 5.0     | 5.0      | 5.6                        |
| XXIII-N80          | 1    | 4   | P 21/c   | 1.411   | 11.0   | 5.3     | 5.2      | 5.6                        |
| XXIII-N23          | 2    | 8   | P n a 21 | 1.438   | 1.8    | 3.0     | 4.6      | 5.8                        |
| XXIII-N24          | 2    | 8   | P 21/c   | 1.424   | 6.4    | 2.4     | 4.8      | 6.1                        |
| XXIII-N95          | 1    | 2   | P -1     | 1.404   | 10.4   | 6.3     | 7.1      | 7.0                        |
| XXIII-N37          | 1    | 4   | P 21/c   | 1.459   | 2.0    | 3.0     | 6.6      | 7.6                        |
| XXIII-N41          | 1    | 4   | P 21/c   | 1.425   | 8.8    | 4.5     | 7.2      | 8.0                        |
| XXIII-N56          | 1    | 2   | P -1     | 1.448   | 7.7    | 4.3     | 5.1      | 9.0                        |

**Table S5.** (continued) Stability ranking for system XXIII.

| Name      | Z' | Z  | Symm.  | Density | PBE+TS | PBE+MBD | PBE0+MBD | PBE0+MBD+ $F_{\text{vib}}$ |
|-----------|----|----|--------|---------|--------|---------|----------|----------------------------|
| XXIII-N49 | 1  | 2  | P -1   | 1.414   | 10.0   | 3.7     | 5.8      | 9.2                        |
| XXIII-N91 | 1  | 2  | P -1   | 1.414   | 8.7    | 6.0     | 7.2      | 9.2                        |
| XXIII-N43 | 1  | 4  | P 21/n | 1.451   | 8.6    | 5.8     | 6.4      | 9.3                        |
| XXIII-N66 | 1  | 2  | P -1   | 1.465   | 0.0    | 3.8     | 7.2      | 9.8                        |
| XXIII-N62 | 1  | 4  | P 21/c | 1.406   | 8.8    | 5.0     | 7.2      | 10.3                       |
| XXIII-N88 | 1  | 4  | P 21/c | 1.440   | 6.4    | 6.7     | 8.7      | 10.9                       |
| XXIII-N48 | 1  | 4  | P 21/c | 1.411   | 8.1    | 5.8     | 8.0      | 11.4                       |
| XXIII-N61 | 1  | 4  | P 21/c | 1.459   | 7.7    | 5.1     | 7.5      | 11.9                       |
| XXIII-N81 | 1  | 4  | P 21/c | 1.443   | 5.9    | 5.0     | 8.4      | 12.5                       |
| XXIII-N35 | 2  | 16 | C 2/c  | 1.459   | 6.5    | 4.5     | 4.5      | n/d                        |
| XXIII-N76 | 2  | 16 | C 2/c  | 1.421   | 3.0    | 3.4     | 4.8      | n/d                        |
| XXIII-N47 | 2  | 4  | P -1   | 1.445   | 7.9    | 5.0     | 5.0      | n/d                        |
| XXIII-N21 | 2  | 8  | P 21/n | 1.416   | 13.0   | 3.8     | 5.0      | n/d                        |
| XXIII-N83 | 2  | 4  | P 21   | 1.425   | 6.1    | 5.3     | 5.1      | n/d                        |
| XXIII-N40 | 2  | 4  | P -1   | 1.431   | 8.6    | 4.2     | 5.2      | n/d                        |
| XXIII-N60 | 2  | 4  | P -1   | 1.446   | 8.0    | 5.2     | 5.2      | n/d                        |
| XXIII-N59 | 2  | 4  | P -1   | 1.447   | 7.9    | 5.2     | 5.2      | n/d                        |
| XXIII-N27 | 2  | 16 | C 2/c  | 1.435   | 3.0    | 3.3     | 5.2      | n/d                        |
| XXIII-N57 | 2  | 4  | P -1   | 1.447   | 7.8    | 5.1     | 5.2      | n/d                        |
| XXIII-N54 | 2  | 16 | C 2/c  | 1.450   | 7.0    | 5.0     | 5.3      | n/d                        |
| XXIII-N63 | 2  | 4  | P -1   | 1.433   | 8.7    | 5.4     | 5.4      | n/d                        |
| XXIII-N36 | 2  | 4  | P -1   | 1.428   | 9.4    | 5.2     | 5.4      | n/d                        |
| XXIII-N32 | 2  | 8  | P 21/c | 1.440   | 10.0   | 4.2     | 5.6      | n/d                        |
| XXIII-N64 | 2  | 8  | P 21/c | 1.437   | 4.0    | 4.6     | 5.6      | n/d                        |
| XXIII-N29 | 2  | 8  | P 21/c | 1.429   | 12.0   | 4.3     | 5.9      | n/d                        |
| XXIII-N71 | 2  | 4  | P -1   | 1.447   | 7.9    | 4.5     | 5.9      | n/d                        |
| XXIII-N73 | 2  | 16 | I 2/c  | 1.445   | 7.4    | 5.5     | 6.0      | n/d                        |
| XXIII-N97 | 2  | 4  | P -1   | 1.410   | 10.3   | 5.7     | 6.1      | n/d                        |
| XXIII-N67 | 2  | 4  | P -1   | 1.420   | 9.0    | 5.8     | 6.2      | n/d                        |
| XXIII-N90 | 2  | 4  | P -1   | 1.437   | 7.5    | 5.7     | 6.2      | n/d                        |
| XXIII-N77 | 2  | 4  | P -1   | 1.452   | 7.4    | 4.5     | 6.3      | n/d                        |
| XXIII-N45 | 2  | 16 | I 2/c  | 1.424   | 5.6    | 4.3     | 6.3      | n/d                        |
| XXIII-N65 | 2  | 4  | P -1   | 1.422   | 8.9    | 5.8     | 6.3      | n/d                        |
| XXIII-N86 | 2  | 8  | C c    | 1.432   | 7.6    | 5.3     | 6.3      | n/d                        |
| XXIII-N89 | 2  | 4  | P -1   | 1.450   | 8.7    | 4.9     | 6.4      | n/d                        |
| XXIII-N87 | 4  | 16 | P 2/c  | 1.449   | 8.3    | 6.3     | 6.5      | n/d                        |
| XXIII-N84 | 2  | 8  | P 21/c | 1.452   | 2.0    | 3.9     | 6.5      | n/d                        |
| XXIII-N82 | 2  | 8  | C c    | 1.424   | 7.3    | 5.4     | 6.6      | n/d                        |
| XXIII-N44 | 2  | 4  | P -1   | 1.431   | 11.0   | 4.8     | 6.6      | n/d                        |
| XXIII-N55 | 2  | 8  | P 21/c | 1.409   | 6.7    | 5.0     | 6.6      | n/d                        |
| XXIII-N34 | 2  | 16 | I 2/c  | 1.420   | 4.6    | 4.3     | 6.7      | n/d                        |
| XXIII-N69 | 2  | 4  | P -1   | 1.436   | 8.9    | 5.2     | 7.0      | n/d                        |

**Table S5.** (continued) Stability ranking for system XXIII.

| Name      | Z' | Z  | Symm.  | Density | PBE+TS | PBE+MBD | PBE0+MBD | PBE0+MBD+ $F_{\text{vib}}$ |
|-----------|----|----|--------|---------|--------|---------|----------|----------------------------|
| XXIII-N96 | 2  | 4  | P -1   | 1.446   | 9.2    | 5.0     | 7.1      | n/d                        |
| XXIII-N98 | 2  | 4  | P -1   | 1.432   | 9.2    | 5.5     | 7.2      | n/d                        |
| XXIII-N58 | 2  | 8  | P 21/c | 1.403   | 11.9   | 5.0     | 7.3      | n/d                        |
| XXIII-N93 | 2  | 4  | P -1   | 1.445   | 8.0    | 5.8     | 7.3      | n/d                        |
| XXIII-N51 | 2  | 4  | P -1   | 1.422   | 13.8   | 5.9     | 7.5      | n/d                        |
| XXIII-N99 | 2  | 16 | I 2/a  | 1.440   | 4.4    | 6.0     | 7.6      | n/d                        |
| XXIII-N72 | 2  | 4  | P -1   | 1.419   | 11.8   | 5.6     | 7.9      | n/d                        |
| XXIII-N75 | 2  | 4  | P -1   | 1.419   | 12.0   | 5.8     | 7.9      | n/d                        |
| XXIII-N79 | 2  | 8  | P 21/n | 1.410   | 14.9   | 6.5     | 8.3      | n/d                        |
| XXIII-N74 | 2  | 4  | P -1   | 1.438   | 12.0   | 6.7     | 8.4      | n/d                        |
| XXIII-N94 | 2  | 4  | P -1   | 1.442   | 10.2   | 7.0     | 8.5      | n/d                        |

**Table S6. Stability ranking for system XXIV in kilojoules per mole per trimer.** The energy of the most stable structure in each ranking was set to zero and the structures are always ordered according to the highest available ranking level. The final ranking includes vibrational free energies calculated at 240 K. In addition, this table contains the number of molecules in the unit cell ( $Z$ ), the space group (Symm.), and the density in  $\text{g}/\text{cm}^3$ .

| Name           | $Z$ | Symm.      | Density | PBE+TS | PBE+MBD | PBE0+MBD | PBE0+MBD+ $F_{\text{vib}}$ |
|----------------|-----|------------|---------|--------|---------|----------|----------------------------|
| XXIV-N2 (Exp.) | 4   | P 21/c     | 1.570   | 0.3    | 1.5     | 0.4      | 0.0                        |
| XXIV-N3        | 4   | P 21/c     | 1.543   | 1.2    | 0.5     | 0.0      | 0.3                        |
| XXIV-N10       | 8   | C 2/c      | 1.521   | 4.1    | 2.0     | 2.4      | 1.1                        |
| XXIV-N53       | 2   | P -1       | 1.566   | 0.0    | 0.8     | 0.8      | 1.3                        |
| XXIV-N7        | 4   | P 21/n     | 1.549   | 2.3    | 1.4     | 2.7      | 1.4                        |
| XXIV-N4        | 4   | P 21/c     | 1.551   | 1.4    | 2.1     | 1.3      | 1.5                        |
| XXIV-N6        | 2   | P -1       | 1.535   | 2.9    | 1.7     | 2.6      | 1.9                        |
| XXIV-N1        | 4   | P 21 21 21 | 1.534   | 1.2    | 0.0     | 2.6      | 3.1                        |
| XXIV-N8        | 4   | P 21/n     | 1.561   | 3.4    | 3.6     | 3.3      | n/d                        |
| XXIV-N9        | 8   | C 2/c      | 1.571   | 2.8    | 3.9     | 3.5      | n/d                        |
| XXIV-N19       | 2   | P -1       | 1.556   | 4.6    | 4.2     | 3.6      | n/d                        |
| XXIV-N12       | 2   | P -1       | 1.541   | 3.9    | 3.1     | 4.2      | n/d                        |
| XXIV-N16       | 4   | P 21/c     | 1.502   | 5.0    | 3.0     | 5.2      | n/d                        |
| XXIV-N21       | 8   | I 2/a      | 1.535   | 4.6    | 4.7     | 5.2      | n/d                        |
| XXIV-N18       | 8   | P c c n    | 1.507   | 4.9    | 4.1     | 5.5      | n/d                        |
| XXIV-N33       | 4   | P 21/c     | 1.571   | 5.6    | 5.7     | 5.7      | n/d                        |
| XXIV-N22       | 8   | I 2/c      | 1.505   | 5.8    | 4.8     | 5.8      | n/d                        |
| XXIV-N43       | 4   | P 21/c     | 1.580   | 7.4    | 6.8     | 6.2      | n/d                        |
| XXIV-N11       | 4   | P 21/c     | 1.479   | 6.0    | 3.3     | 6.2      | n/d                        |
| XXIV-N23       | 2   | P -1       | 1.556   | 5.4    | 5.2     | 6.3      | n/d                        |
| XXIV-N40       | 8   | P b c n    | 1.506   | 7.1    | 6.0     | 6.6      | n/d                        |
| XXIV-N30       | 4   | P 21/n     | 1.527   | 7.2    | 5.5     | 6.6      | n/d                        |
| XXIV-N31       | 8   | I b a 2    | 1.505   | 6.7    | 5.6     | 6.8      | n/d                        |
| XXIV-N29       | 2   | P -1       | 1.506   | 9.0    | 6.3     | 6.8      | n/d                        |
| XXIV-N27       | 4   | P 21/n     | 1.572   | 6.6    | 7.7     | 6.8      | n/d                        |
| XXIV-N45       | 4   | P 21/c     | 1.543   | 7.8    | 7.5     | 7.2      | n/d                        |
| XXIV-N5        | 8   | P b c a    | 1.522   | 4.6    | 4.3     | 7.2      | n/d                        |
| XXIV-N63       | 4   | P 21/c     | 1.527   | 9.8    | 8.1     | 7.4      | n/d                        |
| XXIV-N14       | 4   | P 21 21 21 | 1.523   | 7.2    | 4.7     | 7.4      | n/d                        |
| XXIV-N13       | 4   | P 21 21 21 | 1.518   | 6.8    | 4.2     | 7.4      | n/d                        |
| XXIV-N44       | 8   | C 2/c      | 1.549   | 8.0    | 7.5     | 7.5      | n/d                        |
| XXIV-N50       | 8   | P b c n    | 1.524   | 7.5    | 7.2     | 7.7      | n/d                        |
| XXIV-N32       | 8   | C 2/c      | 1.428   | 8.4    | 4.9     | 7.7      | n/d                        |
| XXIV-N34       | 4   | P 21/c     | 1.456   | 8.0    | 5.3     | 7.9      | n/d                        |
| XXIV-N55       | 4   | P 21 21 21 | 1.548   | 9.1    | 8.9     | 7.9      | n/d                        |
| XXIV-N17       | 8   | P b c n    | 1.602   | 6.5    | 6.6     | 8.1      | n/d                        |
| XXIV-N24       | 4   | P 21/n     | 1.536   | 7.9    | 6.7     | 8.2      | n/d                        |

**Table S6.** (continued) Stability ranking for system XXIV.

| Name     | Z  | Symm.      | Density | PBE+TS | PBE+MBD | PBE0+MBD | PBE0+MBD+ $F_{\text{vib}}$ |
|----------|----|------------|---------|--------|---------|----------|----------------------------|
| XXIV-N58 | 4  | P 21/n     | 1.538   | 6.6    | 7.7     | 8.2      | n/d                        |
| XXIV-N78 | 2  | P -1       | 1.549   | 8.3    | 8.9     | 8.3      | n/d                        |
| XXIV-N20 | 4  | P n a 21   | 1.500   | 7.7    | 4.6     | 8.3      | n/d                        |
| XXIV-N65 | 4  | P 21/n     | 1.484   | 11.9   | 8.0     | 8.3      | n/d                        |
| XXIV-N52 | 4  | P 21/c     | 1.461   | 10.5   | 7.5     | 8.4      | n/d                        |
| XXIV-N49 | 8  | C 2/c      | 1.559   | 7.0    | 8.3     | 8.5      | n/d                        |
| XXIV-N67 | 4  | P -1       | 1.483   | 7.7    | 5.4     | 8.6      | n/d                        |
| XXIV-N36 | 8  | P c c n    | 1.513   | 8.3    | 7.2     | 8.7      | n/d                        |
| XXIV-N62 | 8  | P c c n    | 1.419   | 11.5   | 6.9     | 8.7      | n/d                        |
| XXIV-N39 | 2  | P -1       | 1.502   | 7.7    | 6.0     | 8.7      | n/d                        |
| XXIV-N73 | 4  | P 21/c     | 1.532   | 9.2    | 8.2     | 8.9      | n/d                        |
| XXIV-N42 | 2  | P -1       | 1.513   | 9.5    | 8.3     | 9.2      | n/d                        |
| XXIV-N35 | 2  | P -1       | 1.473   | 8.1    | 6.6     | 9.2      | n/d                        |
| XXIV-N54 | 4  | P 21/n     | 1.463   | 10.3   | 6.6     | 9.2      | n/d                        |
| XXIV-N37 | 4  | P 21/c     | 1.479   | 7.9    | 5.8     | 9.3      | n/d                        |
| XXIV-N47 | 4  | P 21/c     | 1.466   | 9.5    | 6.2     | 9.5      | n/d                        |
| XXIV-N25 | 4  | P 21 21 21 | 1.545   | 8.5    | 7.1     | 10.0     | n/d                        |
| XXIV-N51 | 16 | F d d 2    | 1.563   | 9.5    | 8.8     | 10.1     | n/d                        |
| XXIV-N92 | 8  | C c        | 1.537   | 9.3    | 7.5     | 10.3     | n/d                        |
| XXIV-N85 | 4  | P 21 21 21 | 1.550   | 9.9    | 9.9     | 10.3     | n/d                        |
| XXIV-N64 | 4  | P 21/c     | 1.519   | 11.6   | 9.3     | 10.3     | n/d                        |
| XXIV-N60 | 2  | P -1       | 1.449   | 11.7   | 8.1     | 10.5     | n/d                        |
| XXIV-N70 | 16 | F d d 2    | 1.479   | 10.2   | 9.2     | 10.6     | n/d                        |
| XXIV-N66 | 2  | P 21       | 1.555   | 9.0    | 9.2     | 10.8     | n/d                        |
| XXIV-N90 | 4  | P c a 21   | 1.472   | 11.4   | 8.1     | 10.8     | n/d                        |
| XXIV-N94 | 8  | P c c n    | 1.527   | 10.6   | 9.5     | 11.1     | n/d                        |
| XXIV-N88 | 16 | F d d 2    | 1.595   | 10.0   | 11.2    | 11.1     | n/d                        |
| XXIV-N87 | 2  | P -1       | 1.473   | 10.1   | 8.5     | 11.1     | n/d                        |
| XXIV-N48 | 4  | P 21/n     | 1.417   | 12.5   | 7.2     | 11.2     | n/d                        |
| XXIV-N84 | 8  | I 2/c      | 1.514   | 12.7   | 9.1     | 11.2     | n/d                        |
| XXIV-N91 | 4  | P 21/c     | 1.427   | 12.7   | 8.6     | 11.4     | n/d                        |
| XXIV-N59 | 4  | P 21 21 21 | 1.481   | 11.5   | 7.0     | 11.4     | n/d                        |
| XXIV-N74 | 4  | P 21/c     | 1.490   | 10.6   | 8.1     | 11.5     | n/d                        |
| XXIV-N81 | 4  | P 21/c     | 1.504   | 13.0   | 9.9     | 11.5     | n/d                        |
| XXIV-N89 | 4  | P 21/n     | 1.491   | 11.2   | 9.5     | 11.5     | n/d                        |
| XXIV-N99 | 8  | P c c n    | 1.522   | 10.0   | 10.2    | 11.7     | n/d                        |
| XXIV-N97 | 4  | P 21/c     | 1.551   | 11.9   | 11.0    | 11.9     | n/d                        |
| XXIV-N77 | 4  | P 21/c     | 1.498   | 11.3   | 9.7     | 11.9     | n/d                        |
| XXIV-N61 | 2  | P -1       | 1.494   | 10.1   | 8.6     | 12.0     | n/d                        |
| XXIV-N75 | 4  | P 21/c     | 1.508   | 11.7   | 9.6     | 12.1     | n/d                        |
| XXIV-N95 | 4  | P 21/c     | 1.486   | 10.7   | 9.6     | 12.1     | n/d                        |
| XXIV-N93 | 4  | P 21/n     | 1.532   | 12.9   | 12.1    | 12.2     | n/d                        |

**Table S6.** (continued) Stability ranking for system XXIV.

| Name      | Z  | Symm.      | Density | PBE+TS | PBE+MBD | PBE0+MBD | PBE0+MBD+ $F_{\text{vib}}$ |
|-----------|----|------------|---------|--------|---------|----------|----------------------------|
| XXIV-N69  | 4  | P n a 21   | 1.480   | 13.0   | 8.7     | 12.4     | n/d                        |
| XXIV-N100 | 4  | P 21/n     | 1.548   | 13.7   | 13.0    | 12.4     | n/d                        |
| XXIV-N82  | 4  | P 21 21 21 | 1.508   | 12.4   | 9.7     | 12.7     | n/d                        |
| XXIV-N96  | 4  | P 21 21 21 | 1.473   | 11.8   | 9.4     | 12.7     | n/d                        |
| XXIV-N68  | 4  | P 21/n     | 1.501   | 11.6   | 8.9     | 12.7     | n/d                        |
| XXIV-N86  | 16 | F d d 2    | 1.531   | 11.9   | 10.2    | 12.8     | n/d                        |
| XXIV-N76  | 2  | P 21       | 1.415   | 13.9   | 8.7     | 12.8     | n/d                        |
| XXIV-N71  | 4  | P 21/c     | 1.344   | 13.9   | 7.4     | 13.0     | n/d                        |
| XXIV-N80  | 8  | I 2/c      | 1.446   | 11.2   | 8.2     | 13.1     | n/d                        |
| XXIV-N83  | 4  | P 21/c     | 1.469   | 13.2   | 9.7     | 13.7     | n/d                        |
| XXIV-N79  | 4  | P 21/n     | 1.461   | 12.2   | 9.4     | 14.4     | n/d                        |
| XXIV-N38  | 4  | P 21/c     | 1.419   | 12.6   | 7.8     | 14.9     | n/d                        |
| XXIV-N46  | 4  | P n a 21   | 1.417   | 13.1   | 8.3     | 15.2     | n/d                        |

**Table S7. Stability ranking for system XXV in kilojoules per mole per dimer.** The energy of the most stable structure in each ranking was set to zero and the structures are always ordered according to the highest available ranking level. The final ranking includes vibrational free energies calculated at 300 K. In addition, this table contains the number of molecules in the unit cell ( $Z$ ), the space group (Symm.), and the density in  $\text{g}/\text{cm}^3$ .

| Name          | $Z$ | Symm.    | Density | PBE+TS | PBE+MBD | PBE0+MBD | PBE0+MBD+ $F_{\text{vib}}$ |
|---------------|-----|----------|---------|--------|---------|----------|----------------------------|
| XXV-N6 (Exp.) | 4   | P 21/c   | 1.445   | 0.5    | 2.3     | 0.0      | 0.0                        |
| XXV-N5        | 8   | P 21/c   | 1.431   | 0.0    | 0.0     | 1.0      | 3.8                        |
| XXV-N11       | 4   | P 2/c    | 1.411   | 11.9   | 3.6     | 2.5      | 5.7                        |
| XXV-N1        | 2   | P -1     | 1.453   | 4.4    | 3.2     | 4.2      | 7.0                        |
| XXV-N12       | 8   | P b c n  | 1.397   | 13.8   | 5.1     | 4.2      | n/d                        |
| XXV-N15       | 8   | P b c n  | 1.409   | 13.3   | 4.4     | 4.3      | n/d                        |
| XXV-N18       | 4   | P c a 21 | 1.393   | 14.4   | 5.3     | 4.6      | n/d                        |
| XXV-N22       | 2   | P -1     | 1.431   | 7.0    | 6.7     | 4.7      | n/d                        |
| XXV-N3        | 2   | P -1     | 1.444   | 5.5    | 4.3     | 4.8      | n/d                        |
| XXV-N16       | 4   | P 21/c   | 1.422   | 4.0    | 3.9     | 5.1      | n/d                        |
| XXV-N4        | 2   | P -1     | 1.417   | 6.7    | 5.4     | 5.7      | n/d                        |
| XXV-N2        | 4   | P 21/n   | 1.437   | 7.6    | 3.8     | 6.0      | n/d                        |
| XXV-N33       | 8   | P b c n  | 1.407   | 14.1   | 7.4     | 6.1      | n/d                        |
| XXV-N10       | 4   | P 21/c   | 1.399   | 12.5   | 5.8     | 6.3      | n/d                        |
| XXV-N29       | 4   | P -1     | 1.425   | 10.9   | 8.3     | 6.8      | n/d                        |
| XXV-N28       | 2   | P -1     | 1.435   | 7.6    | 8.3     | 7.1      | n/d                        |
| XXV-N19       | 4   | P 21/c   | 1.417   | 13.3   | 8.5     | 7.1      | n/d                        |
| XXV-N7        | 4   | P 21/n   | 1.430   | 9.2    | 5.4     | 7.1      | n/d                        |
| XXV-N36       | 8   | P b c a  | 1.387   | 17.1   | 8.6     | 7.6      | n/d                        |
| XXV-N25       | 4   | P 21/n   | 1.404   | 11.3   | 6.9     | 7.8      | n/d                        |
| XXV-N13       | 4   | P 21/n   | 1.413   | 10.8   | 5.7     | 7.9      | n/d                        |
| XXV-N27       | 8   | I 2/c    | 1.419   | 14.5   | 8.8     | 8.2      | n/d                        |
| XXV-N48       | 4   | P 21/n   | 1.409   | 11.7   | 7.9     | 8.6      | n/d                        |
| XXV-N26       | 2   | P -1     | 1.418   | 12.6   | 7.9     | 8.7      | n/d                        |
| XXV-N23       | 4   | P 21/c   | 1.433   | 10.7   | 8.4     | 9.0      | n/d                        |
| XXV-N9        | 4   | P 21/c   | 1.433   | 10.6   | 7.8     | 9.1      | n/d                        |
| XXV-N42       | 4   | P 21/n   | 1.424   | 12.6   | 9.6     | 9.2      | n/d                        |
| XXV-N20       | 8   | P b c n  | 1.404   | 12.9   | 8.6     | 9.3      | n/d                        |
| XXV-N49       | 2   | P -1     | 1.401   | 11.0   | 9.7     | 9.6      | n/d                        |
| XXV-N39       | 16  | F d d 2  | 1.392   | 15.4   | 9.6     | 9.9      | n/d                        |
| XXV-N30       | 4   | P 21/c   | 1.411   | 18.0   | 9.7     | 9.9      | n/d                        |
| XXV-N38       | 4   | P 21/c   | 1.370   | 17.2   | 9.0     | 9.9      | n/d                        |
| XXV-N32       | 2   | P -1     | 1.408   | 15.3   | 9.2     | 10.2     | n/d                        |
| XXV-N17       | 16  | F d d 2  | 1.391   | 14.6   | 7.8     | 10.6     | n/d                        |
| XXV-N44       | 4   | P 21/c   | 1.395   | 16.2   | 9.4     | 10.9     | n/d                        |
| XXV-N65       | 4   | P 21/n   | 1.424   | 17.3   | 9.9     | n/d      | n/d                        |
| XXV-N24       | 4   | P 21/c   | 1.395   | 14.6   | 10.0    | n/d      | n/d                        |

**Table S7.** (continued) Stability ranking for system XXV.

| Name     | Z  | Symm.      | Density | PBE+TS | PBE+MBD | PBE0+MBD | PBE0+MBD+ $F_{\text{vib}}$ |
|----------|----|------------|---------|--------|---------|----------|----------------------------|
| XXV-N66  | 4  | P 21/c     | 1.396   | 16.3   | 10.7    | n/d      | n/d                        |
| XXV-N60  | 8  | A b a 2    | 1.427   | 11.6   | 10.8    | n/d      | n/d                        |
| XXV-N50  | 4  | P 21/n     | 1.428   | 14.7   | 10.8    | n/d      | n/d                        |
| XXV-N45  | 1  | P 1        | 1.387   | 18.7   | 11.1    | n/d      | n/d                        |
| XXV-N47  | 2  | P -1       | 1.423   | 13.8   | 11.6    | n/d      | n/d                        |
| XXV-N59  | 8  | P b c a    | 1.422   | 17.4   | 11.9    | n/d      | n/d                        |
| XXV-N43  | 4  | P 21/c     | 1.417   | 19.6   | 11.9    | n/d      | n/d                        |
| XXV-N100 | 4  | P 21/c     | 1.397   | 18.5   | 11.9    | n/d      | n/d                        |
| XXV-N71  | 4  | P 21/c     | 1.418   | 18.4   | 12.0    | n/d      | n/d                        |
| XXV-N70  | 4  | C c        | 1.410   | 14.7   | 12.0    | n/d      | n/d                        |
| XXV-N77  | 4  | P 21/c     | 1.383   | 22.4   | 12.2    | n/d      | n/d                        |
| XXV-N61  | 4  | P 21/n     | 1.409   | 16.1   | 12.3    | n/d      | n/d                        |
| XXV-N62  | 4  | P 21/c     | 1.409   | 18.1   | 12.4    | n/d      | n/d                        |
| XXV-N40  | 4  | P n a 21   | 1.437   | 15.0   | 12.5    | n/d      | n/d                        |
| XXV-N79  | 2  | P -1       | 1.424   | 19.1   | 12.6    | n/d      | n/d                        |
| XXV-N55  | 16 | I 41/a     | 1.396   | 18.2   | 12.6    | n/d      | n/d                        |
| XXV-N80  | 16 | F d d 2    | 1.383   | 17.3   | 12.7    | n/d      | n/d                        |
| XXV-N57  | 8  | P b c a    | 1.409   | 17.8   | 12.8    | n/d      | n/d                        |
| XXV-N52  | 8  | P b c a    | 1.419   | 18.4   | 12.9    | n/d      | n/d                        |
| XXV-N53  | 2  | P -1       | 1.437   | 14.0   | 13.0    | n/d      | n/d                        |
| XXV-N68  | 2  | P n        | 1.377   | 20.6   | 13.0    | n/d      | n/d                        |
| XXV-N83  | 4  | P 21/c     | 1.378   | 21.5   | 13.0    | n/d      | n/d                        |
| XXV-N81  | 2  | P 21       | 1.415   | 15.0   | 13.0    | n/d      | n/d                        |
| XXV-N41  | 4  | P 21/c     | 1.381   | 16.9   | 13.2    | n/d      | n/d                        |
| XXV-N64  | 4  | P 21/c     | 1.408   | 18.7   | 13.2    | n/d      | n/d                        |
| XXV-N86  | 4  | P 21 21 21 | 1.401   | 17.8   | 13.3    | n/d      | n/d                        |
| XXV-N58  | 4  | P 21/c     | 1.423   | 17.3   | 13.4    | n/d      | n/d                        |
| XXV-N69  | 2  | P -1       | 1.399   | 20.6   | 13.7    | n/d      | n/d                        |
| XXV-N73  | 2  | P 21       | 1.427   | 19.7   | 13.8    | n/d      | n/d                        |
| XXV-N87  | 2  | P -1       | 1.425   | 18.2   | 13.9    | n/d      | n/d                        |
| XXV-N84  | 8  | I 2/a      | 1.363   | 27.3   | 13.9    | n/d      | n/d                        |
| XXV-N72  | 8  | I 2/c      | 1.407   | 18.3   | 13.9    | n/d      | n/d                        |
| XXV-N78  | 4  | P 21/c     | 1.379   | 21.3   | 13.9    | n/d      | n/d                        |
| XXV-N46  | 4  | P 21/n     | 1.423   | 15.8   | 14.1    | n/d      | n/d                        |
| XXV-N89  | 4  | P 21/c     | 1.420   | 15.0   | 14.3    | n/d      | n/d                        |
| XXV-N56  | 8  | I 2/c      | 1.379   | 21.1   | 14.4    | n/d      | n/d                        |
| XXV-N63  | 2  | P -1       | 1.416   | 19.2   | 14.5    | n/d      | n/d                        |
| XXV-N82  | 2  | P -1       | 1.408   | 21.2   | 14.5    | n/d      | n/d                        |
| XXV-N74  | 4  | P 21/c     | 1.404   | 18.9   | 14.7    | n/d      | n/d                        |
| XXV-N75  | 4  | P 21/n     | 1.398   | 19.1   | 15.1    | n/d      | n/d                        |
| XXV-N85  | 8  | I 2/c      | 1.429   | 16.3   | 15.2    | n/d      | n/d                        |
| XXV-N90  | 4  | P n a 21   | 1.412   | 19.1   | 15.6    | n/d      | n/d                        |



**Table S7.** (continued) Stability ranking for system XXV.

| Name    | Z | Symm.    | Density | PBE+TS | PBE+MBD | PBE0+MBD | PBE0+MBD+ $F_{\text{vib}}$ |
|---------|---|----------|---------|--------|---------|----------|----------------------------|
| XXV-N91 | 4 | P 21/c   | 1.383   | 20.7   | 15.7    | n/d      | n/d                        |
| XXV-N54 | 8 | P b c a  | 1.407   | 18.9   | 16.1    | n/d      | n/d                        |
| XXV-N92 | 8 | C 2/c    | 1.383   | 22.1   | 16.1    | n/d      | n/d                        |
| XXV-N88 | 8 | P b c a  | 1.410   | 21.3   | 16.2    | n/d      | n/d                        |
| XXV-N94 | 8 | C 2/c    | 1.387   | 23.8   | 16.6    | n/d      | n/d                        |
| XXV-N97 | 4 | P 21/n   | 1.360   | 25.7   | 16.8    | n/d      | n/d                        |
| XXV-N95 | 2 | P -1     | 1.395   | 27.7   | 17.0    | n/d      | n/d                        |
| XXV-N93 | 8 | I 2/a    | 1.401   | 21.4   | 17.1    | n/d      | n/d                        |
| XXV-N96 | 4 | P 21/n   | 1.387   | 19.2   | 17.2    | n/d      | n/d                        |
| XXV-N99 | 2 | P -1     | 1.387   | 21.5   | 17.4    | n/d      | n/d                        |
| XXV-N76 | 4 | P c a 21 | 1.401   | 22.4   | 17.5    | n/d      | n/d                        |
| XXV-N98 | 2 | P -1     | 1.426   | 20.4   | 20.5    | n/d      | n/d                        |

**Table S8. Stability ranking for system XXVI in kilojoules per mole per molecule.** The energy of the most stable structure in each ranking was set to zero and the structures are always ordered according to the highest available ranking level. The final ranking includes vibrational free energies calculated at 300 K. In addition, this table contains the number of molecules in the unit cell ( $Z$ ), the space group (Symm.), and the density in  $\text{g/cm}^3$ .

| Name           | $Z$ | Symm.  | Density | PBE+TS | PBE+MBD | PBE0+MBD | PBE0+MBD+ $F_{\text{vib}}$ |
|----------------|-----|--------|---------|--------|---------|----------|----------------------------|
| XXVI-N1 (Exp.) | 2   | P -1   | 1.380   | 6.1    | 0.0     | 0.0      | 0.0                        |
| XXVI-N5        | 8   | P 21/c | 1.392   | 4.7    | 1.7     | 1.6      | 0.2                        |
| XXVI-N4        | 2   | P -1   | 1.377   | 7.2    | 1.4     | 1.1      | 0.3                        |
| XXVI-N9        | 4   | P 21/n | 1.410   | 0.0    | 0.6     | 1.2      | 2.0                        |
| XXVI-N6        | 8   | P 21/c | 1.407   | 1.6    | 2.0     | 2.5      | 3.0                        |
| XXVI-N3        | 4   | P -1   | 1.391   | 6.3    | 2.6     | 2.7      | 3.3                        |
| XXVI-N25       | 2   | P -1   | 1.388   | 8.0    | 3.4     | 2.6      | 3.4                        |
| XXVI-N11       | 4   | P -1   | 1.403   | 2.0    | 2.5     | 2.7      | 3.6                        |
| XXVI-N17       | 4   | P -1   | 1.419   | 4.5    | 3.7     | 3.3      | n/d                        |
| XXVI-N10       | 4   | P -1   | 1.394   | 4.6    | 3.2     | 3.6      | n/d                        |
| XXVI-N15       | 4   | P -1   | 1.417   | 4.5    | 3.8     | 3.7      | n/d                        |
| XXVI-N99       | 8   | P 21/c | 1.390   | 6.5    | 3.6     | 3.8      | n/d                        |
| XXVI-N23       | 4   | P -1   | 1.422   | 4.1    | 3.9     | 4.0      | n/d                        |
| XXVI-N12       | 4   | P 21   | 1.402   | 3.1    | 3.2     | 4.1      | n/d                        |
| XXVI-N13       | 4   | P -1   | 1.381   | 8.1    | 3.6     | 4.4      | n/d                        |
| XXVI-N8        | 4   | P -1   | 1.390   | 7.7    | 3.7     | 4.5      | n/d                        |
| XXVI-N22       | 4   | P -1   | 1.434   | 4.1    | 4.3     | 4.6      | n/d                        |
| XXVI-N34       | 4   | P -1   | 1.381   | 9.9    | 4.1     | 5.0      | n/d                        |
| XXVI-N19       | 4   | P -1   | 1.400   | 7.3    | 4.1     | 5.3      | n/d                        |
| XXVI-N24       | 8   | C c    | 1.390   | 8.5    | 4.0     | 5.3      | n/d                        |
| XXVI-N42       | 4   | P -1   | 1.376   | 10.4   | 4.5     | 5.6      | n/d                        |
| XXVI-N28       | 4   | P -1   | 1.374   | 9.8    | 4.4     | 5.9      | n/d                        |
| XXVI-N40       | 4   | P -1   | 1.380   | 9.5    | 4.6     | n/d      | n/d                        |
| XXVI-N18       | 4   | P -1   | 1.390   | 7.9    | 4.6     | n/d      | n/d                        |
| XXVI-N48       | 4   | P -1   | 1.414   | 6.1    | 4.8     | n/d      | n/d                        |
| XXVI-N63       | 4   | P -1   | 1.397   | 8.2    | 4.9     | n/d      | n/d                        |
| XXVI-N33       | 4   | P -1   | 1.376   | 9.4    | 4.9     | n/d      | n/d                        |
| XXVI-N32       | 4   | P -1   | 1.379   | 9.6    | 4.9     | n/d      | n/d                        |
| XXVI-N38       | 4   | P -1   | 1.414   | 5.9    | 5.0     | n/d      | n/d                        |
| XXVI-N41       | 4   | P -1   | 1.378   | 9.4    | 5.0     | n/d      | n/d                        |
| XXVI-N26       | 4   | P -1   | 1.426   | 4.4    | 5.0     | n/d      | n/d                        |
| XXVI-N72       | 4   | P -1   | 1.382   | 9.3    | 5.0     | n/d      | n/d                        |
| XXVI-N20       | 16  | C 2/c  | 1.381   | 9.3    | 5.1     | n/d      | n/d                        |
| XXVI-N27       | 4   | P -1   | 1.420   | 4.6    | 5.1     | n/d      | n/d                        |
| XXVI-N62       | 4   | P -1   | 1.412   | 6.4    | 5.1     | n/d      | n/d                        |
| XXVI-N30       | 4   | P -1   | 1.374   | 9.5    | 5.1     | n/d      | n/d                        |
| XXVI-N16       | 4   | P -1   | 1.411   | 5.8    | 5.2     | n/d      | n/d                        |

**Table S8.** (continued) Stability ranking for system XXVI.

| Name      | Z  | Symm.  | Density | PBE+TS | PBE+MBD | PBE0+MBD | PBE0+MBD+ $F_{\text{vib}}$ |
|-----------|----|--------|---------|--------|---------|----------|----------------------------|
| XXVI-N60  | 4  | P -1   | 1.413   | 5.9    | 5.2     | n/d      | n/d                        |
| XXVI-N45  | 2  | P 1    | 1.429   | 5.4    | 5.2     | n/d      | n/d                        |
| XXVI-N47  | 4  | P -1   | 1.422   | 5.5    | 5.2     | n/d      | n/d                        |
| XXVI-N65  | 4  | P -1   | 1.383   | 9.6    | 5.2     | n/d      | n/d                        |
| XXVI-N52  | 4  | P -1   | 1.419   | 5.7    | 5.3     | n/d      | n/d                        |
| XXVI-N67  | 4  | P -1   | 1.377   | 10.1   | 5.3     | n/d      | n/d                        |
| XXVI-N58  | 4  | P -1   | 1.380   | 9.6    | 5.3     | n/d      | n/d                        |
| XXVI-N14  | 4  | P -1   | 1.385   | 9.0    | 5.3     | n/d      | n/d                        |
| XXVI-N54  | 4  | P -1   | 1.375   | 9.9    | 5.4     | n/d      | n/d                        |
| XXVI-N51  | 4  | P -1   | 1.414   | 6.3    | 5.5     | n/d      | n/d                        |
| XXVI-N84  | 4  | P -1   | 1.412   | 7.8    | 5.5     | n/d      | n/d                        |
| XXVI-N61  | 4  | P -1   | 1.428   | 5.8    | 5.5     | n/d      | n/d                        |
| XXVI-N78  | 4  | P -1   | 1.393   | 9.0    | 5.6     | n/d      | n/d                        |
| XXVI-N39  | 4  | P -1   | 1.410   | 6.9    | 5.6     | n/d      | n/d                        |
| XXVI-N31  | 4  | P -1   | 1.395   | 8.4    | 5.6     | n/d      | n/d                        |
| XXVI-N64  | 4  | P -1   | 1.431   | 5.4    | 5.7     | n/d      | n/d                        |
| XXVI-N44  | 4  | P -1   | 1.378   | 10.1   | 5.7     | n/d      | n/d                        |
| XXVI-N85  | 4  | P -1   | 1.409   | 7.9    | 5.7     | n/d      | n/d                        |
| XXVI-N74  | 2  | P 1    | 1.374   | 10.5   | 5.8     | n/d      | n/d                        |
| XXVI-N75  | 4  | P -1   | 1.375   | 10.7   | 5.8     | n/d      | n/d                        |
| XXVI-N35  | 16 | C 2/c  | 1.375   | 10.8   | 5.8     | n/d      | n/d                        |
| XXVI-N50  | 4  | P -1   | 1.418   | 6.4    | 5.8     | n/d      | n/d                        |
| XXVI-N49  | 4  | P -1   | 1.409   | 7.6    | 5.9     | n/d      | n/d                        |
| XXVI-N82  | 4  | P -1   | 1.376   | 10.4   | 5.9     | n/d      | n/d                        |
| XXVI-N83  | 4  | P -1   | 1.412   | 7.2    | 5.9     | n/d      | n/d                        |
| XXVI-N68  | 4  | P -1   | 1.420   | 5.9    | 5.9     | n/d      | n/d                        |
| XXVI-N55  | 2  | P -1   | 1.416   | 7.7    | 5.9     | n/d      | n/d                        |
| XXVI-N71  | 4  | P -1   | 1.413   | 7.0    | 5.9     | n/d      | n/d                        |
| XXVI-N96  | 4  | P -1   | 1.416   | 6.9    | 5.9     | n/d      | n/d                        |
| XXVI-N56  | 2  | P 1    | 1.414   | 6.5    | 6.0     | n/d      | n/d                        |
| XXVI-N100 | 4  | P -1   | 1.403   | 8.3    | 6.0     | n/d      | n/d                        |
| XXVI-N87  | 4  | P n    | 1.395   | 8.4    | 6.0     | n/d      | n/d                        |
| XXVI-N29  | 16 | C 2/c  | 1.410   | 8.1    | 6.1     | n/d      | n/d                        |
| XXVI-N86  | 4  | P -1   | 1.424   | 6.2    | 6.1     | n/d      | n/d                        |
| XXVI-N94  | 4  | P -1   | 1.391   | 8.8    | 6.1     | n/d      | n/d                        |
| XXVI-N70  | 4  | P -1   | 1.419   | 6.7    | 6.1     | n/d      | n/d                        |
| XXVI-N77  | 4  | P -1   | 1.428   | 5.1    | 6.2     | n/d      | n/d                        |
| XXVI-N93  | 4  | P -1   | 1.386   | 11.5   | 6.2     | n/d      | n/d                        |
| XXVI-N73  | 4  | P 21/n | 1.401   | 3.6    | 6.2     | n/d      | n/d                        |
| XXVI-N91  | 4  | P 21   | 1.387   | 10.8   | 6.2     | n/d      | n/d                        |
| XXVI-N92  | 4  | P -1   | 1.372   | 12.0   | 6.3     | n/d      | n/d                        |
| XXVI-N80  | 8  | C c    | 1.391   | 10.0   | 6.3     | n/d      | n/d                        |

**Table S8.** (continued) Stability ranking for system XXVI.

| Name     | Z  | Symm.  | Density | PBE+TS | PBE+MBD | PBE0+MBD | PBE0+MBD+ $F_{\text{vib}}$ |
|----------|----|--------|---------|--------|---------|----------|----------------------------|
| XXVI-N57 | 4  | P -1   | 1.425   | 5.3    | 6.3     | n/d      | n/d                        |
| XXVI-N89 | 4  | P -1   | 1.415   | 7.4    | 6.4     | n/d      | n/d                        |
| XXVI-N79 | 4  | P -1   | 1.382   | 10.7   | 6.4     | n/d      | n/d                        |
| XXVI-N37 | 4  | P 21   | 1.382   | 10.2   | 6.4     | n/d      | n/d                        |
| XXVI-N81 | 4  | P -1   | 1.410   | 7.1    | 6.5     | n/d      | n/d                        |
| XXVI-N46 | 8  | C 2/c  | 1.421   | 8.3    | 6.5     | n/d      | n/d                        |
| XXVI-N88 | 4  | P -1   | 1.421   | 5.9    | 6.5     | n/d      | n/d                        |
| XXVI-N43 | 8  | C 2/c  | 1.387   | 7.0    | 6.6     | n/d      | n/d                        |
| XXVI-N59 | 16 | C 2/c  | 1.396   | 8.8    | 6.7     | n/d      | n/d                        |
| XXVI-N90 | 8  | C c    | 1.392   | 8.5    | 6.7     | n/d      | n/d                        |
| XXVI-N98 | 4  | P -1   | 1.405   | 7.7    | 6.8     | n/d      | n/d                        |
| XXVI-N97 | 4  | P -1   | 1.406   | 7.9    | 6.9     | n/d      | n/d                        |
| XXVI-N53 | 8  | C 2/c  | 1.394   | 9.5    | 7.1     | n/d      | n/d                        |
| XXVI-N95 | 4  | P 21/c | 1.420   | 8.7    | 7.6     | n/d      | n/d                        |
| XXVI-N69 | 2  | P -1   | 1.446   | 7.1    | 8.6     | n/d      | n/d                        |

**Table S9. Errors of PBE + TS-optimized structures with regard to experimental structures.** This table shows the relative error in % for cell lengths ( $a, b, c$ ), angles ( $\alpha, \beta, \gamma$ ), cell volume, and density. In addition the RMSD<sub>20</sub> is shown in Å for the settings described in the Methods section.

| Exp. str. | Calc. Str. | $a$   | $b$   | $c$   | $\alpha$ | $\beta$ | $\gamma$ | Volume | Density | RMSD <sub>20</sub> |
|-----------|------------|-------|-------|-------|----------|---------|----------|--------|---------|--------------------|
| XXII      | XXII-N2    | 0.46  | 0.94  | 2.07  |          | 0.76    |          | 2.99   | -2.90   | 0.103              |
| XXIII-A   | XXIII-N85  | -1.25 | -2.12 | 0.06  |          | -1.42   |          | -3.09  | 3.18    | 0.198              |
| XXIII-B   | XXIII-N4   | 1.13  | -0.92 | -3.95 | 4.28     | 0.26    | -1.39    | -4.53  | 4.71    | 0.277              |
| XXIII-C   | XXIII-N6   | -1.43 | -1.24 | -0.97 | 2.47     | 2.01    | 0.11     | -3.19  | 3.30    | 0.237              |
| XXIII-D   | XXIII-N39  | -3.56 | 0.74  | 1.24  |          | 2.11    |          | -3.51  | 3.67    | 0.447              |
| XXIII-E   | XXIII-E    | -1.15 | -3.63 | -1.69 | -3.05    | 0.93    | -0.55    | -4.73  | 4.96    | 0.479              |
| XXIV      | XXIV-N2    | 2.17  | -0.99 | -0.78 |          | 1.04    |          | 0.11   | -0.06   | 0.119              |
| XXV       | XXV-N6     | -0.06 | -1.30 | -1.61 |          | 0.72    |          | -3.43  | 3.51    | 0.129              |
| XXVI      | XXVI-N1    | -1.02 | -0.67 | -1.95 | 3.30     | 0.73    | 0.86     | -2.47  | 2.53    | 0.268              |

**Table S10. Errors of the thermally expanded structures (corresponding to 300 K within the QHA) with regard to experimental structures.** This table shows the relative error in % for cell lengths ( $a, b, c$ ), angles ( $\alpha, \beta, \gamma$ ), cell volume, and density. In addition the RMSD<sub>20</sub> is shown in Å for the settings described in the Methods section.

| Exp. str. | Calc. Str.    | $a$   | $b$   | $c$   | $\alpha$ | $\beta$ | $\gamma$ | Volume | Density | RMSD <sub>20</sub> |
|-----------|---------------|-------|-------|-------|----------|---------|----------|--------|---------|--------------------|
| XXIII-A   | XXIII-N85-qha | -0.46 | -0.73 | 0.28  |          | -1.48   |          | -0.70  | 0.74    | 0.193              |
| XXIII-B   | XXIII-N4-qha  | 2.84  | 0.75  | -3.72 | 3.97     | 1.56    | -1.49    | -0.76  | 0.72    | 0.293              |
| XXIII-C   | XXIII-N6-qha  | -0.69 | -0.75 | -0.36 | 2.03     | 2.06    | 0.23     | -1.37  | 1.43    | 0.244              |
| XXIII-D   | XXIII-N39-qha | -2.34 | 2.13  | 1.50  |          | 2.07    |          | -0.66  | 0.67    | 0.408              |
| XXIII-E   | XXIII-E-qha   | 0.35  | -2.42 | -1.49 | -3.16    | 0.56    | -1.02    | -1.70  | 1.70    | 0.479              |

**Data S1. All PBE + TS–optimized structures (light settings) and the thermally expanded structures for system XXIII.** The structure numbers correspond to the rank in the initial structures provided by Neumann *et al.* (4). The structure labels corresponding to the experimentally confirmed structures are given in Table S9. The thermally expanded structures corresponding to 300 K are labeled with *qha*.
